## **Correction: The Tripartite Associations between Bacteriophage, *Wolbachia*, and Arthropods**

Seth R. Bordenstein, Michelle L. Marshall, Adam J. Fry, Ulandt Kim, Jennifer J. Wernegreen

DOI: 10.1371/journal.ppat.0020043

In *PLoS Pathogens*, volume 2, issue 5:

The length of the inset bar in Figure 5C should equal 50 nm, not 100 nm as originally stated.

This correction note may be found online at DOI: 10.1371/journal.ppat.0020106. Published October 27, 2006.

Citation: (2006) Correction: The tripartite associations between bacteriophage, *Wolbachia*, and arthropods. *PLoS Pathog* 2(10): e106.

DOI: 10.1371/journal.ppat.0020106

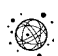

Source: http://journals.plos.org/plospathogens/article/file?id=10.1371/journal.ppat.0020106
